# Supplementary material for: Nanoparticle-Doped Hybrid Polyelectrolyte Microcapsules with Controlled Photoluminescence for Potential Bioimaging Applications
Source: MDPI journal article supplement (doi:10.3390/polym13234076), 2021-11-24
Supplement: s1 [file s1]

# Supplementary Materials

## Nanoparticle-Doped Hybrid Polyelectrolyte Microcapsules with Controlled Photoluminescence for Potential Bioimaging Applications

Galina Nifontova <sup>1,2</sup>, Victor Krivenkov <sup>2,3</sup>, Mariya Zvaigzne <sup>2</sup>, Anton Efimov <sup>4</sup>, Evgeny Korostylev <sup>5</sup>, Sergei Zarubin <sup>5</sup>, Alexander Karaulov <sup>6</sup>, Igor Nabiev <sup>1,2,6\*</sup> and Alyona Sukhanova <sup>1\*</sup>

- <sup>1</sup> Laboratoire de Recherche en Nanosciences, LRN-EA4682, Université de Reims Champagne-Ardenne, 51100 Reims, France  
<sup>2</sup> Laboratory of Nano-Bioengineering, National Research Nuclear University MEPhI (Moscow Engineering Physics Institute), 115409 Moscow, Russian Federation  
<sup>3</sup> Centro de Física de Materiales (MPC, CSIC-UPV/EHU), University of Basque Country (UPV-EHU), Paseo Manuel de Lardizabal 5, 20018 Donostia-San Sebastian, Spain  
<sup>4</sup> Shumakov National Medical Research Center of Transplantology and Artificial Organs, 123182 Moscow, Russian Federation  
<sup>5</sup> Moscow Institute of Physics and Technology (State University), Dolgoprudny, Moscow Region, 141701 Russian Federation  
<sup>6</sup> Sechenov First Moscow State Medical University (Sechenov University), 119146 Moscow, Russian Federation

\* Correspondence: I.N., [igor.nabiev@univ-reims.fr](mailto:igor.nabiev@univ-reims.fr); A. S., [alyona.sukhanova@univ-reims.fr](mailto:alyona.sukhanova@univ-reims.fr)

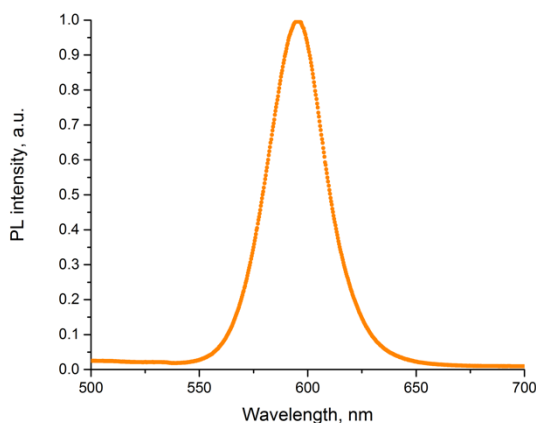

**Figure S1.** Fluorescence spectrum of the nanoparticle-doped hybrid polyelectrolyte microcapsules.
